# Supplementary material
Source: ML conference proceedings conference paper supplement (https://openreview.net/forum?id=rFZl7LLs5e5)

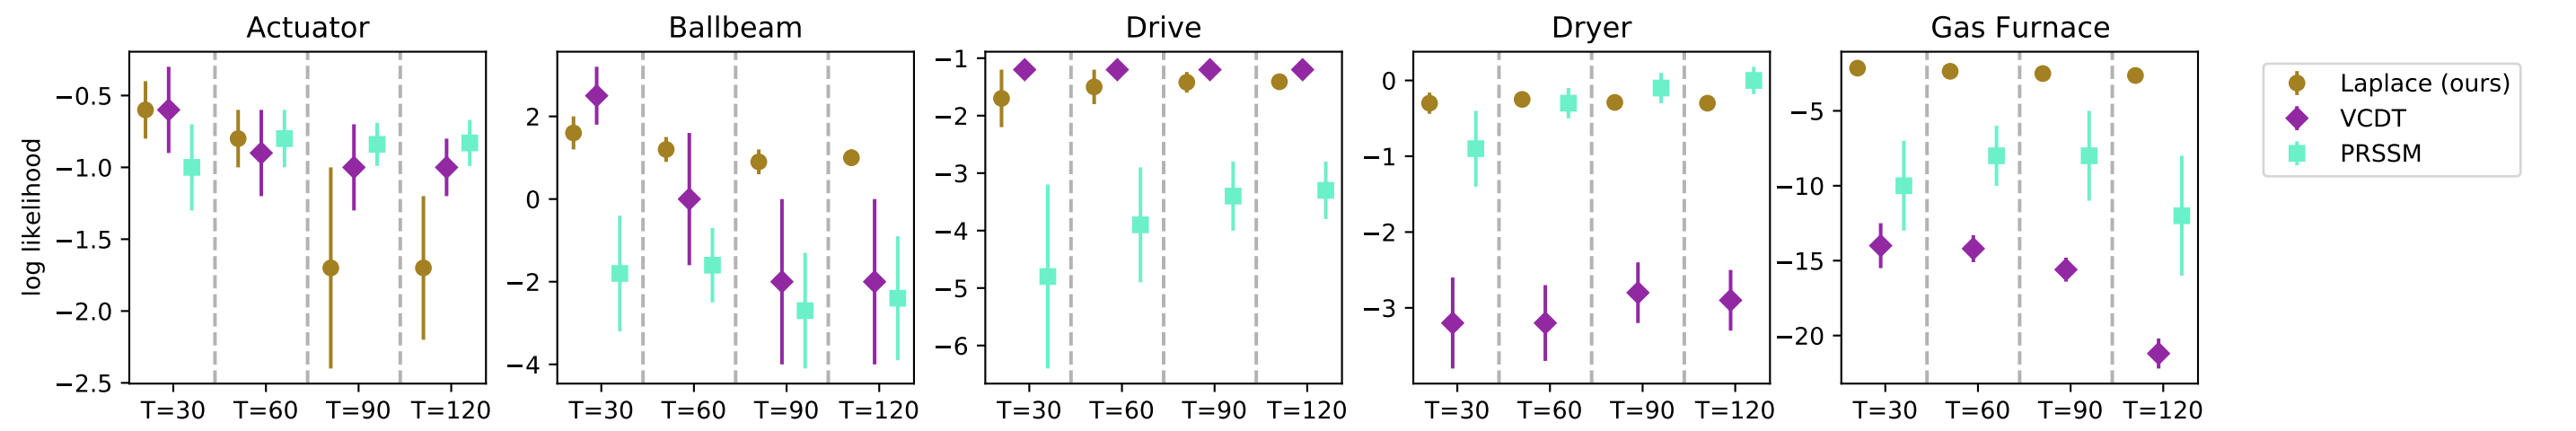

Supplement: supplementary_material [file attachment]

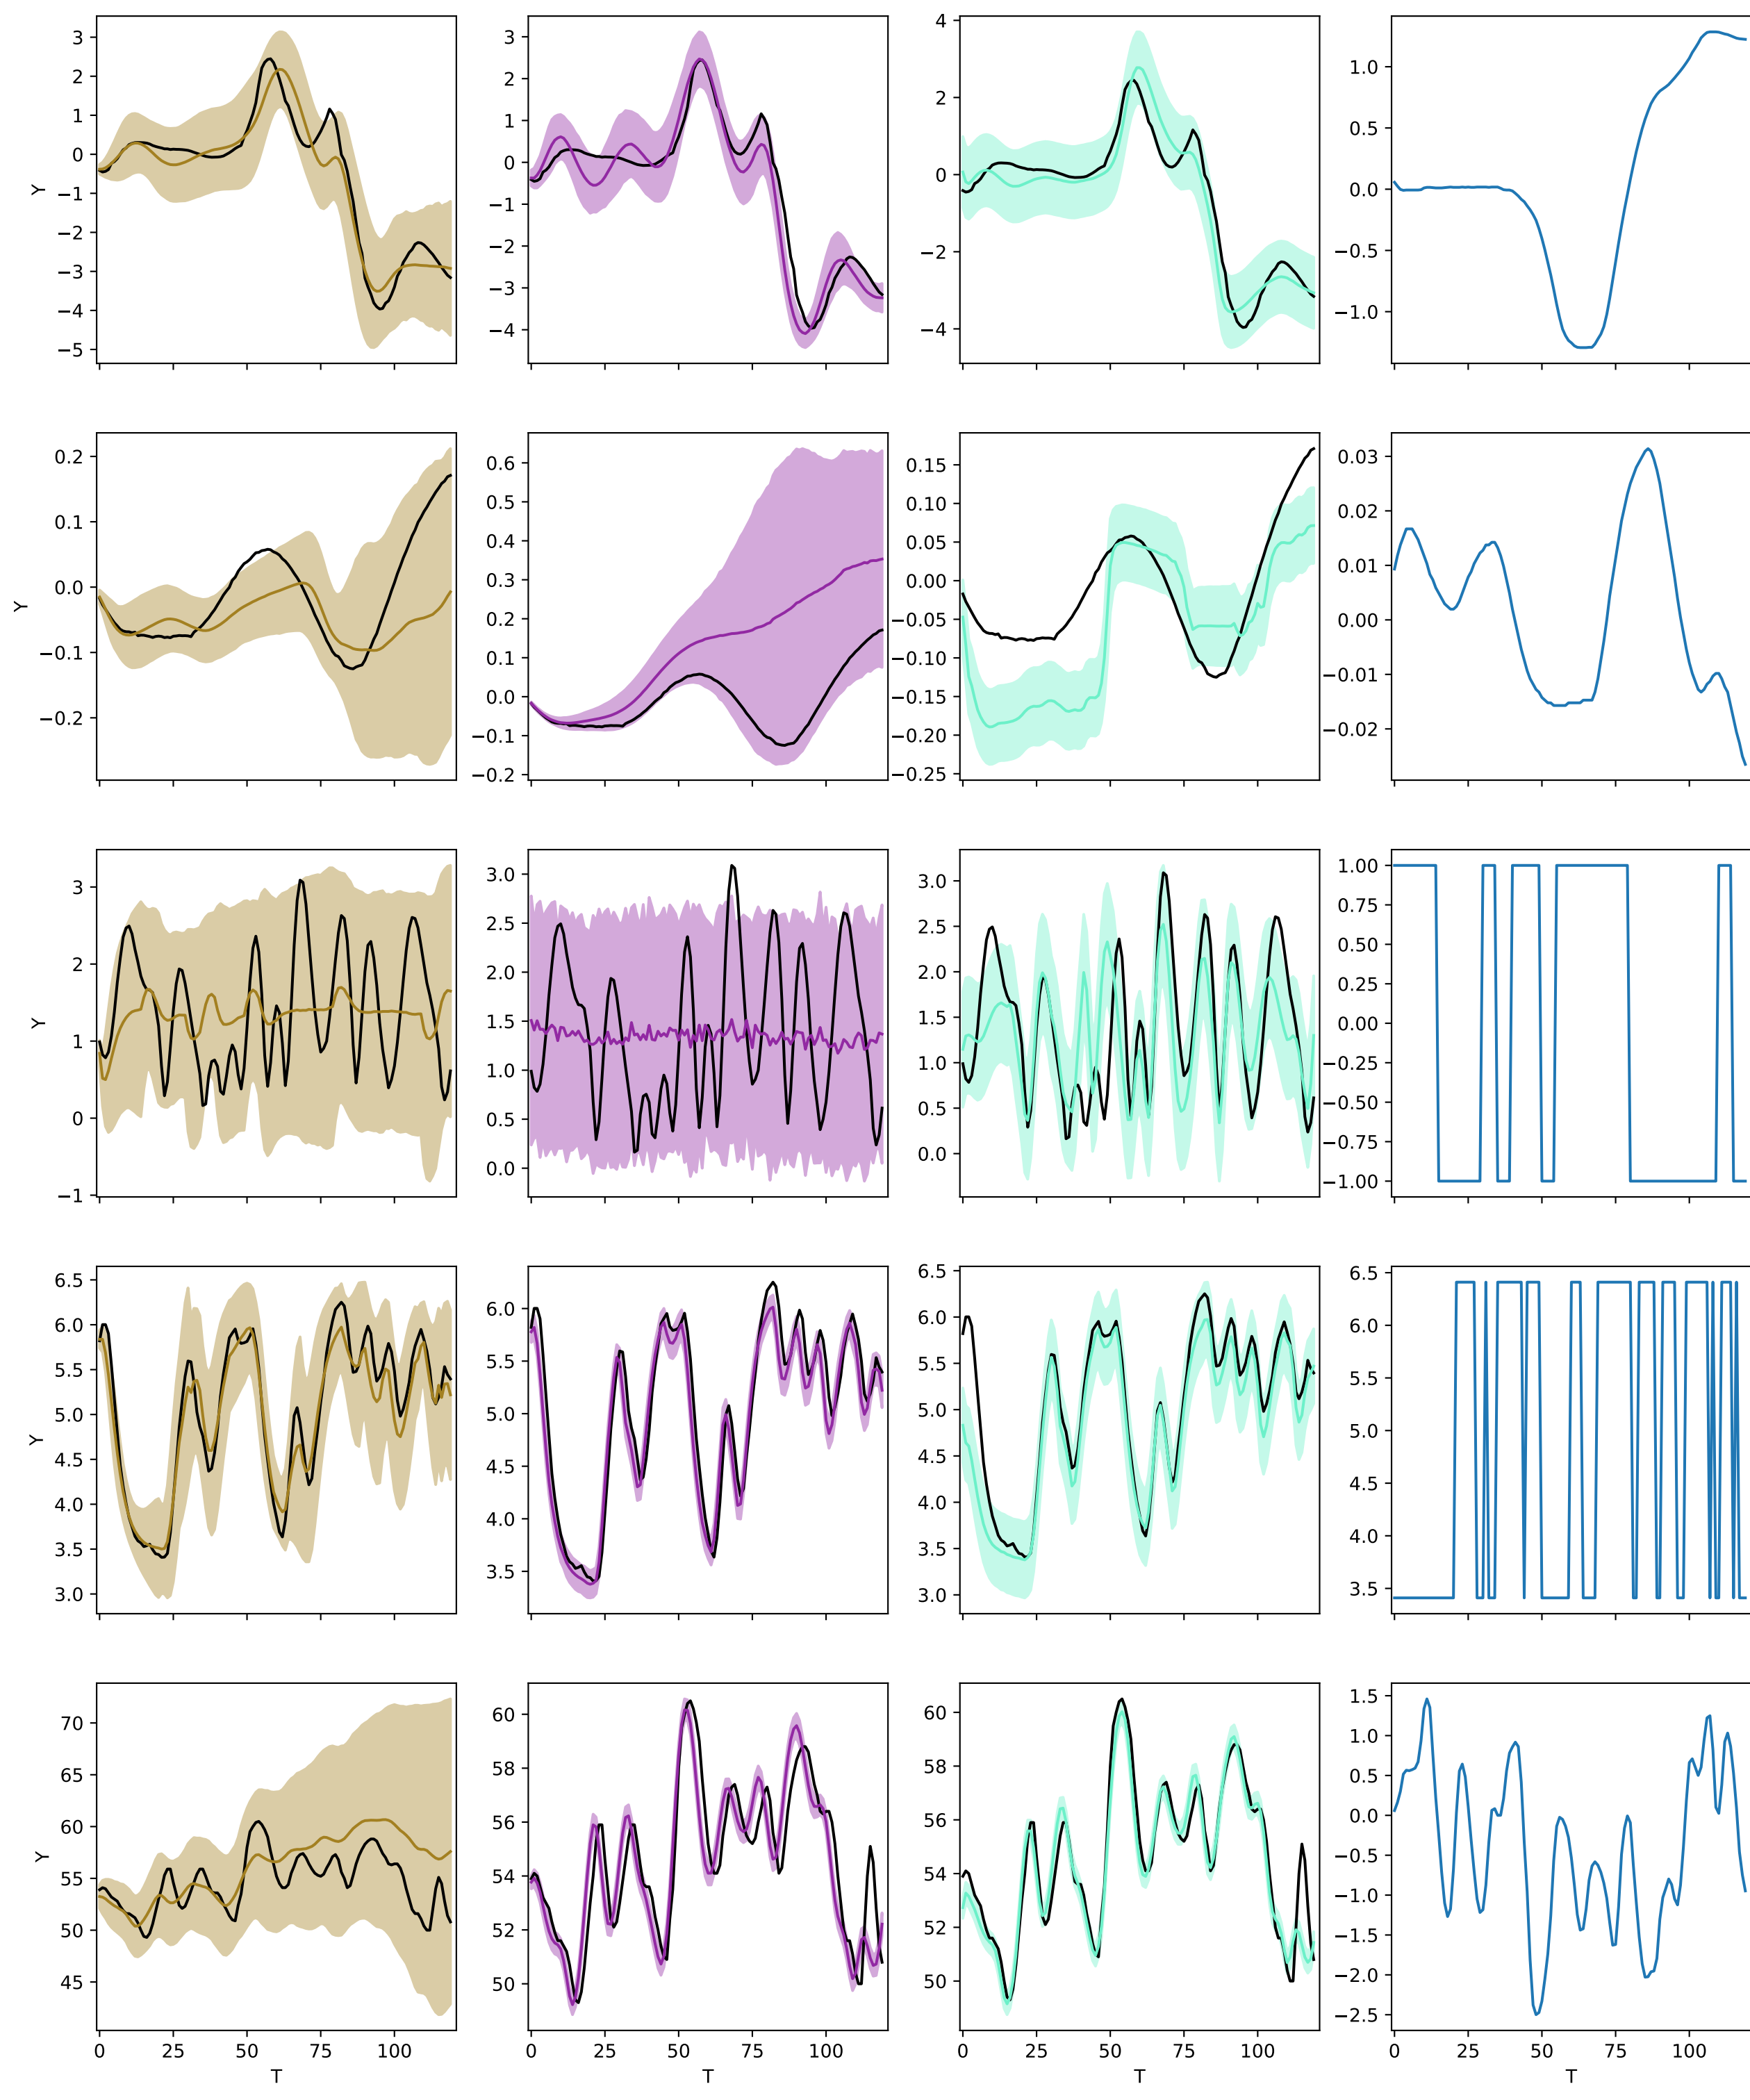

Supplement: supplementary_material [file attachment]

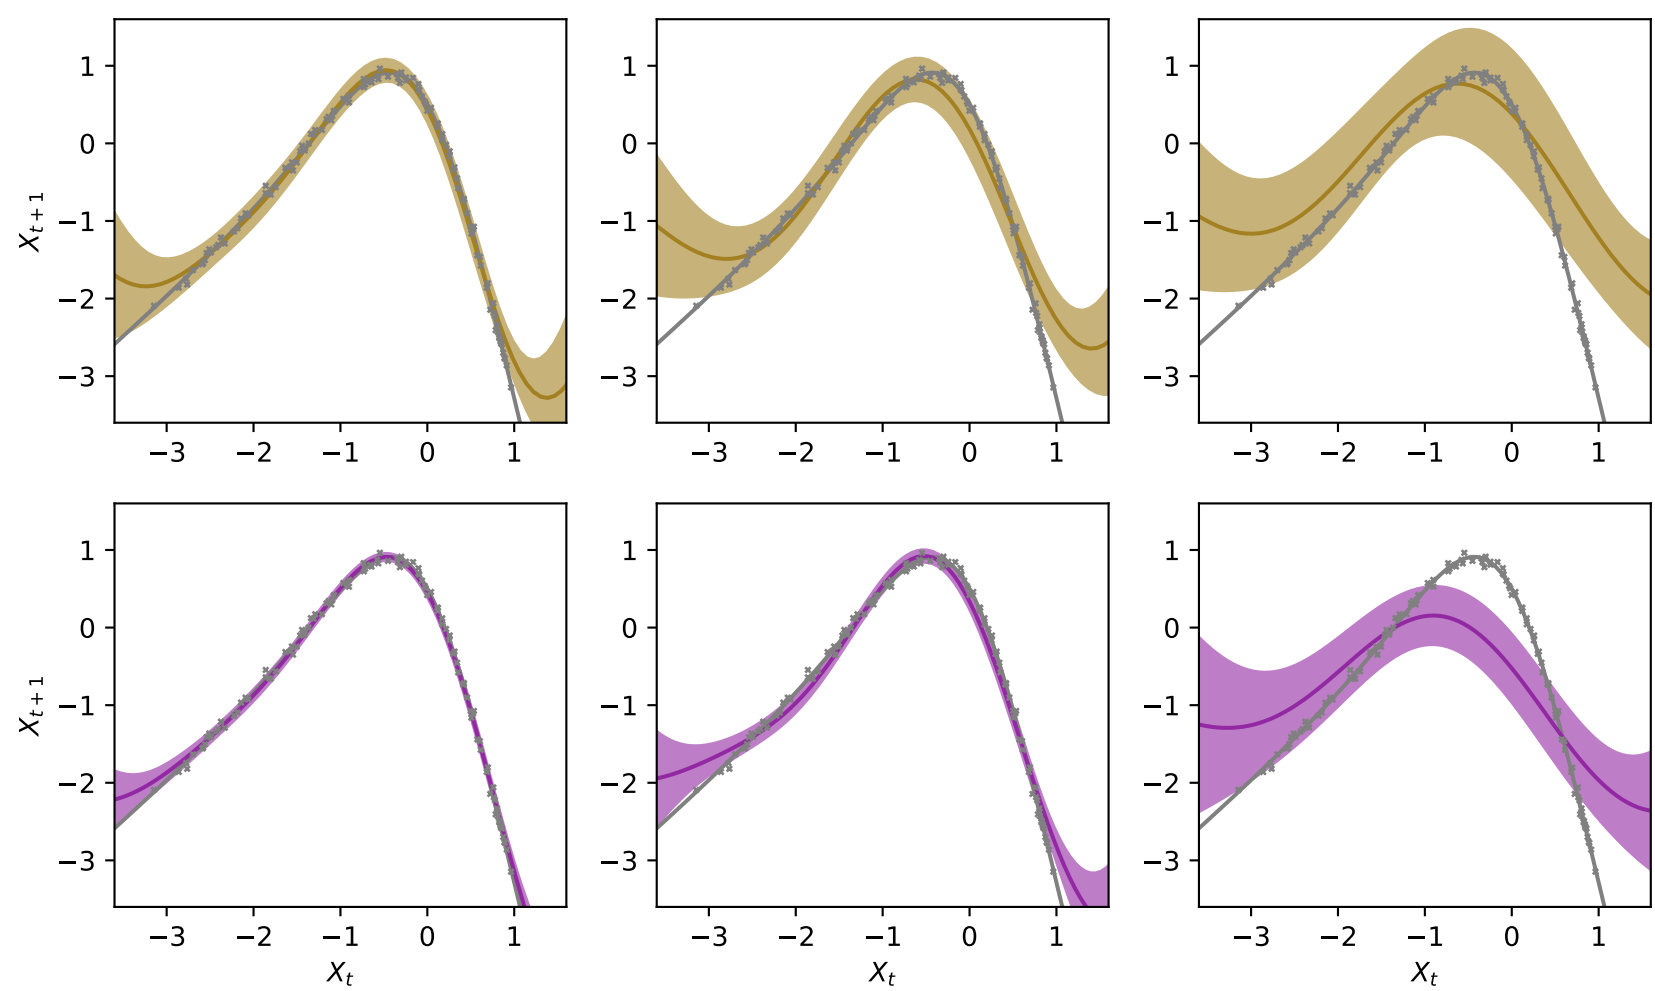

Supplement: supplementary_material [file attachment]

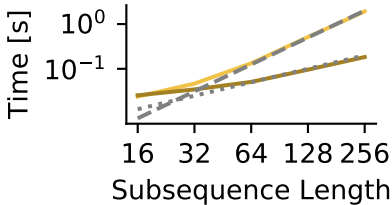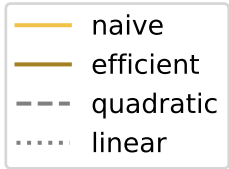

Supplement: supplementary_material [file attachment]

Mixture of Gaussians

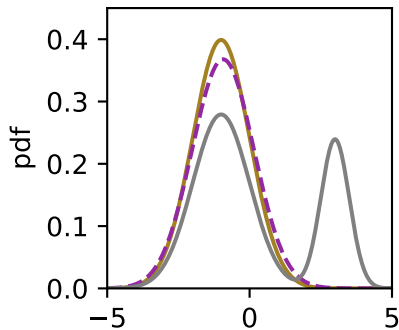

Student-T

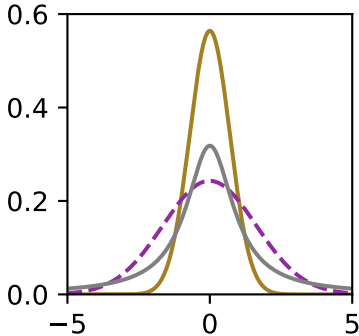

Log-Normal

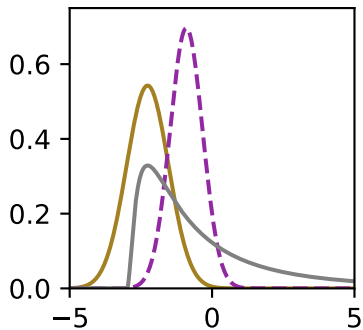

Supplement: supplementary_material [file attachment]

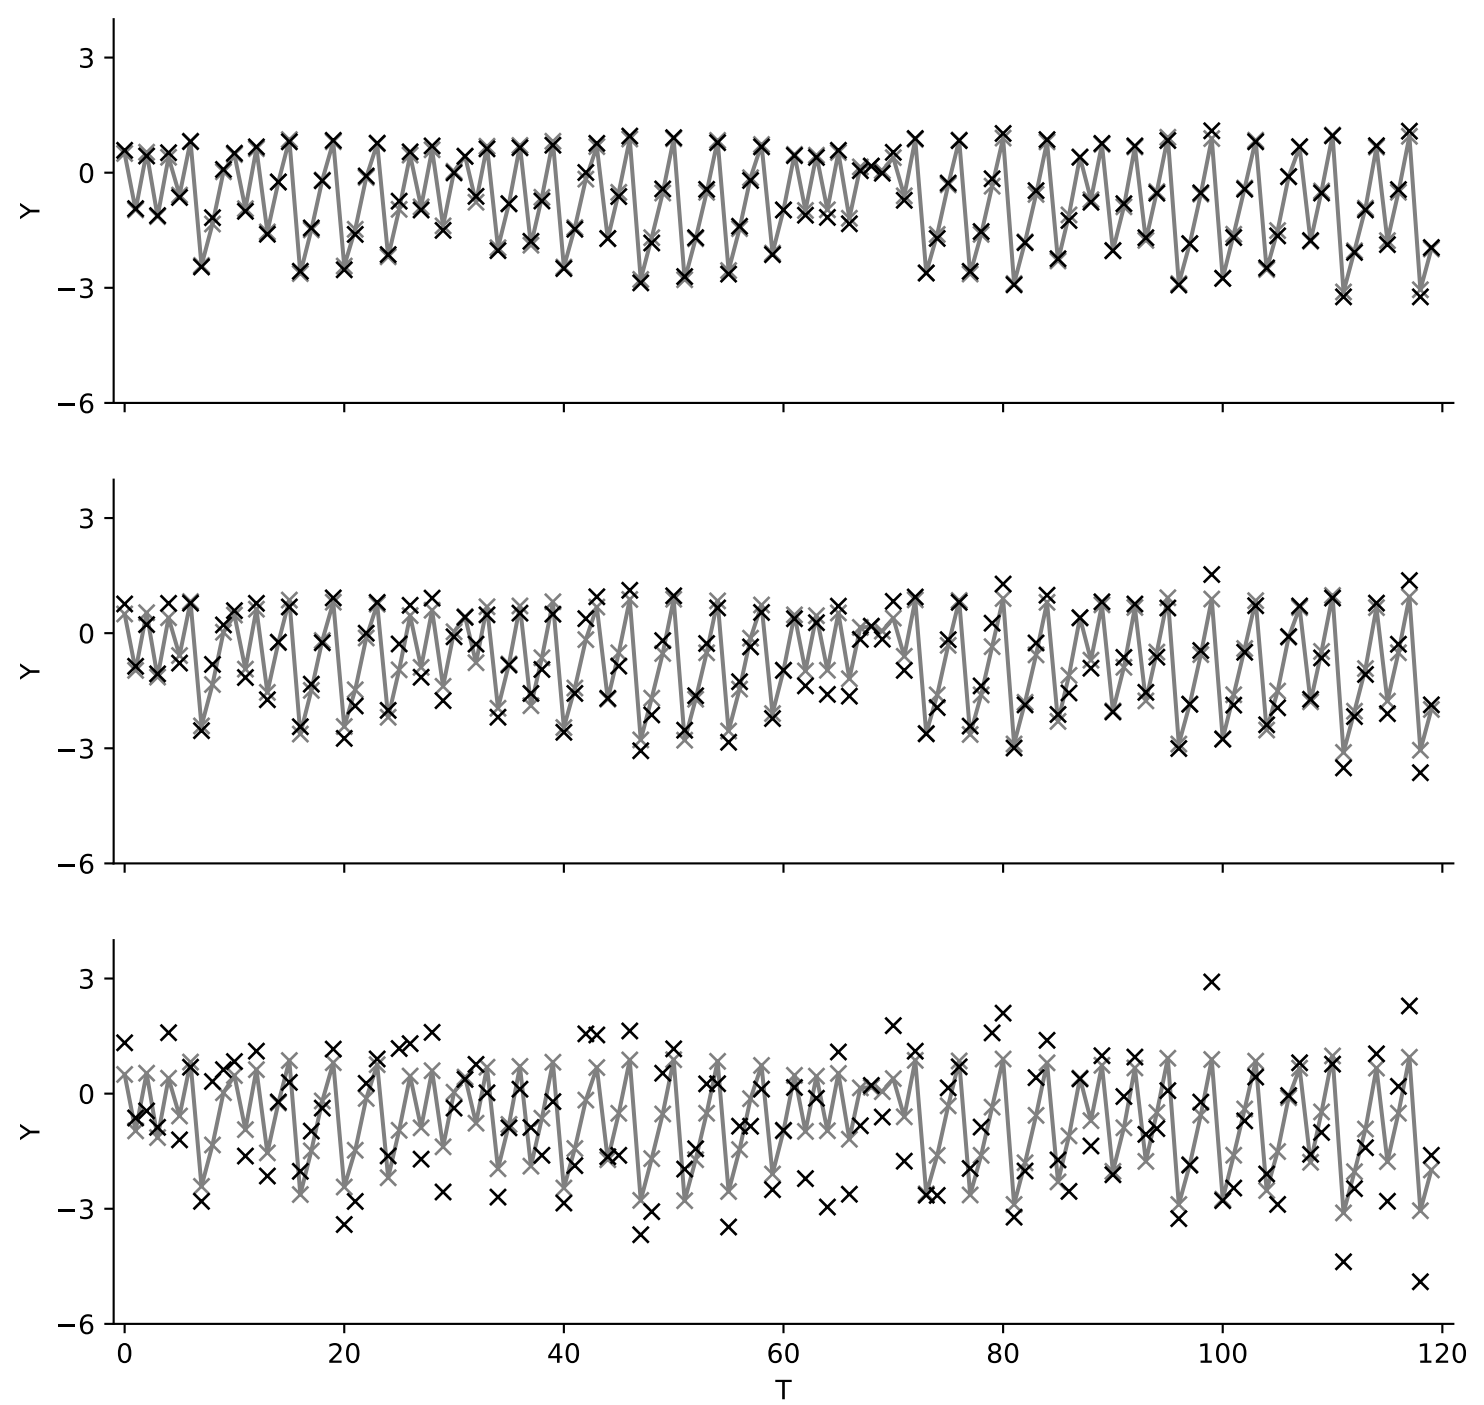

Supplement: supplementary_material [file attachment]
